# Supplementary material
Source: HighWire-hosted journal article supplement (https://learnmem.cshlp.org/content/suppl/2019/11/08/26.12.473)
Supplement: Supplemental_Material.docx [file Supplemental_Material.docx]

**Supplemental Material**

Across time and space: Spatial-temporal binding under stress

Gundula Zerbes MSc1 and Lars Schwabe PhD1

**1** Department of Cognitive Psychology, University of Hamburg, Germany

**Supplemental Results**

**Supplemental Figure S1**

Supplemental results

Neural Signature of Successful Object Recognition

Although this study focused on investigating the neural processes involved in memory integration, we additionally examined processes contributing to subsequent object recognition per se. To this end, we re-run the analyses of ERPs and brain oscillatory power described in the main manuscript, but included successful object recognition (forgotten trials vs. trials with object recognition only) instead of successful color memory as a fixed effect. The model contained the same predictors as the model testing the effects of associative memory described in the main manuscript, except that the confidence rating was omitted, because it was only assessed in trials with an ‘old’-response.

*P300.* The P300 amplitude was, similar to the model examining the influence of correct color memory, reduced for *spatial* compared to *combined* trials (*t* = -6.80, *p* < .001, *β* = -0.23), but did not differ between *spatial* and *spatial-temporal* trials (*t* = -0.21, *p* < .833, *β* = 0.01). In addition, a trend-level trial type × group interaction emerged (*t* = -1.89, *p* = .059, *β* = -0.06), suggesting opposite trends in the stress and control groups: for *spatial-temporal* compared to *spatial* trials, P300 amplitude was descriptively higher in the stress group (*t* = 1.41, *p* = .159, *β* = 0.06) but lower in the control group (*t* = -1.14, *p* = .253, *β* = -0.05). No other effects of stress or subsequent memory were significant (all *|t|* < 1.20, all *p* > .229, all *|β|* < 0.39). The models with the physiological stress as predictors revealed a positive influence of systolic blood pressure on P300 (*t* = 2.38, *p* = .020, *β* = 0.03), similar to the effect already observed in the model testing the influence of successful color memory. In addition, there was a salivary cortisol × subsequent memory interaction (*t* = 2.43, *p* = .015, *β* = 0.02), driven by a descriptively positive effect of salivary cortisol on P300 amplitude for forgotten trials (*t* = 0.80, *p* = .428, *β* = 0.05), while there was no effect for trials with mere object recognition (*t* = -0.05, *p* = .964, *β* > -0.01). No other effects of blood pressure or salivary cortisol were significant (all *|t|* < 1.35, all *p* > .179, all *|β|* < 0.05).

*LPC.* The LPC amplitude was reduced for *spatial* compared to *combined* trials (*t* = -6.58, *p* < .001, *β* = -0.22) as well as for *spatial-temporal* compared to *spatial* trials (*t* = 3.77, *p* < .001, *β* = 0.12), as also observed in the model using color memory as a predictor. This main effect was qualified by a significant trial type × group interaction (*t* = 2.44, *p* = .015, *β* = 0.08), indicating a more pronounced difference between *combined* and *spatial* trials for the stress group (*t* = -6.60, *p* < .001, *β* = -0.31) than for the control group (*t* = -2.87, *p* = .004, *β* = -0.14). No other effects containing the factors group, trial type, or subsequent memory approached significance (all *|t|* < 1.62, all *p* > .105, all *|β|* < 0.08).

Models including the physiological stress response (systolic blood pressure during manipulation/ peak salivary cortisol), revealed a trend-level positive effect of systolic blood pressure on LPC amplitude (*t* = 1.82, *p* = .073, *β* = 0.02). In addition, there was a significant salivary cortisol × subsequent memory interaction (*t* = 2.33, *p* = .020, *β* = 0.02). To pursue this effect, the model was rerun separately for participants with high and low cortisol levels using a median-split (median = 5.74 nmol/l). For participants with higher cortisol levels, but not for those with lower levels of cortisol, LPC amplitude was lower for subsequently correct color judgements compared to mere object recognition (high cortisol: *t* = 2.43, *p* = .015, *β* = 0.13; low cortisol: *t* = -1.08, *p* = .279, *β* = -0.06). All other main and interaction effects involving the physiological stress response were non-significant (all *|t|* < 1.02, all *p* > .307, all *|β|* < 0.02).

*Slow Waves.* The anterior Slow Wave was more positive for subsequently correctly remembered objects compared to forgotten trials (*t* = -3.99, *p* < .001, *β* = -0.19). Further, there was a trend-level trial type × subsequent memory interaction (*t* = -1.69, *p* = .091, *β* = -0.06), suggesting that the more positive anterior Slow Wave for correctly remembered objects was more pronounced in *spatial-temporal* trials (*t* = -4.02, *p* < .001, *β* = -0.32) than in *spatial* trials (*t* = -2.15, *p* = .032, *β* = -0.18) and absent in the *combined* trials (*t* = -0.38, *p* = .707, *β* = -0.03).

The posterior Slow Wave was decreased for *spatial* compared to *combined* trials (*t* = -3.20, *p* = .001, *β* < -0.13) as well as for *spatial* compared to *spatial-temporal* trials (*t* = 2.62, *p* = .009, *β* = 0.10), mirroring the effect already found in the model testing for effects of correct color memory. In addition, there was a main effect for object recognition memory, with a decreased amplitude for subsequently correctly remembered compared to forgotten trials (*t* = 3.48, *p* < .001, *β* = 0.18). Apart from that, there were no effects of stress or subsequent memory (all *|t|* < 1.36, all *p* > .175, all *|β|* < 0.07).

The anterior and posterior Slow Wave were additionally modeled using systolic blood pressure and salivary cortisol level as predictors instead of group. However, these models yielded only a trend-level effect, which could not be resolved in a meaningful way (salivary cortisol × subsequent memory in the posterior Slow Wave: *t* = 1.92, *p* = .055, *β* = 0.02) or non-significant effects (all *|t|* < 1.62, all *p* > .105, all *|β|* < 0.03).

*Brain Oscillations.* Power in the earlier time-frequency cluster in the theta band, did not differ between trials with later object recognition and later forgotten trials (*t* = 1.38, *p* = .170, *β* = 0.03). However, a trend-level group × subsequent memory interaction emerged (*t* = -1.66, *p* = .097, *β* = -0.04). Separate models for each group revealed decreased theta power for correctly recognized compared to forgotten trials in the stress group (*t* = 2.35, *p* = .020, *β* = 0.07), but not in the control group (*t* = -0.18, *p* = .854, *β* = -0.01). Apart from that, there were only trend-level effects, which could not be resolved in a meaningful way (subsequent memory × group × trial type: *t* = 1.78, *p* = .076, *β* = 0.03) and non-significant effects (all *|t|* < 1.38, all *p* > .170, all *|β|* < 0.03).

For the later cluster spanning theta and alpha frequencies, power was decreased for subsequently recognized objects compared to later forgotten objects (*t* = 3.74, *p* < .001, *β* = 0.09). Further, and similar to the model testing the effect of subsequent color memory, a main effect of trial type emerged, with decreased power for *spatial* compared to *combined* trials (*t* = -3.10, *p* = .002, *β* = -0.06), but no difference between *spatial* and *spatial-temporal* trials (*t* = 0.56, *p* = .574, *β* = 0.01). In addition, there was a trial type × group interaction (*t* = 1.97, *p* = .050, *β* = 0.04). Follow-up tests revealed descriptively opposing differences between *spatial* and *spatial-temporal* trials for the stress (*spatial-temporal* < *spatial*: *t* = -1.01, *p* = .311, *β* = -0.03) and the control group (*spatial-temporal > spatial*: *t* = 1.61, *p* = .110, *β* = 0.05). Apart from that, no effects approached significance (all *|t|* < 1.04, all *p* > .300, all *|β|* < 0.02).

Both the power in the early and the late cluster were additionally modeled using salivary cortisol and systolic blood pressure as predictors in separate models. These models yielded merely a trend-wise three-way interaction for the early cluster (systolic blood pressure × subsequent memory × trial type: *t* = -1.92, *p* = .056, *β* > -0.01), which could not be resolved in a meaningful way. No other effects of salivary cortisol or systolic blood pressure on either time-frequency cluster approached significance (all *|t|* < -1.53, all *p* > .126, all *|β|* < 0.03).

In sum, the models including object recognition as a predictor yielded similar amplitude differences for spatial discontinuity as already observed in the models focusing on color memory. However, for the models including object recognition as a predictor these trial type effects were modulated by stress in the LPC, with a more pronounced trial type effect in the stress group. Regarding subsequent object recognition, the ERPs and the time-frequency data diverged: While the Slow Wave amplitude influenced both later color memory and object recognition, the theta power decrease was specific to later color memory (although the later, broader time-frequency cluster comprising the theta and alpha frequency band was also indicative of later object recognition).

Supplemental Figure S1


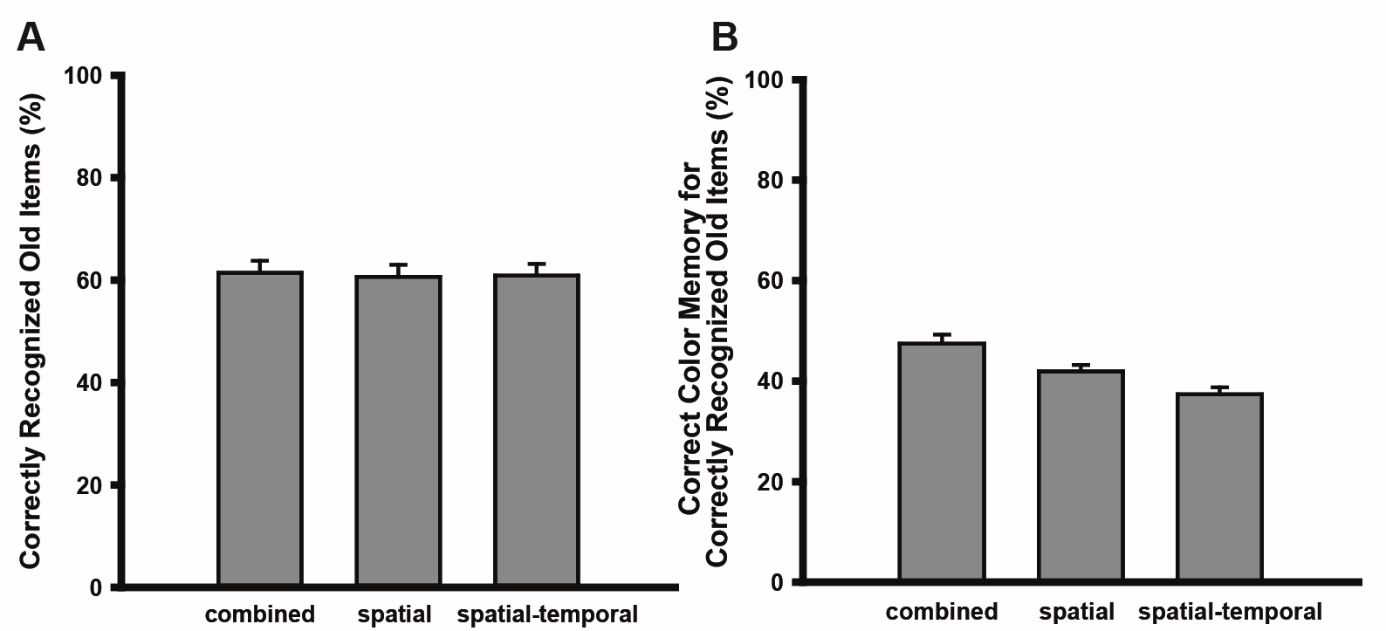


Supplemental Figure S1 Memory performance averaged across groups. (A) Recognition memory and (B) color memory. Error Bars represent SEM.
